# Supplementary material for: Touching the density limits of energetic materials by molecular design
Source: Royal Society of Chemistry journal article supplement (doi:10.1039/d3nj02968a), 2023-01-01
Supplement: d3nj02968a1.pdf [file d3nj02968a1.pdf]

## Electronic Supporting Information

# Touching the density limits of energetic materials by molecular design

Yunlu Li,<sup>\*[a,b]</sup> Xinzhong Wang,<sup>[a]</sup> Mei Xue<sup>\*[c]</sup>

---

- [a] Dr. Yunlu Li, Prof. Xinzhong Wang,  
Department of Electronic Communication and Technology  
Shenzhen Institute of Information Technology  
2188 Longxiang Avenue, Longgang District, Shenzhen 518172 (P.R. China)  
E-mail: liyunlu2014@163.com, 7520210114@bit.edu.cn
- [b] Dr. Yunlu Li,  
School of Materials and Energy  
University of Electronic Science and Technology of China  
2006 Xiyuan Avenue, High-tech Zone (West), Chengdu 610054 (P.R. China)
- [c] Dr. Mei Xue,  
School of Materials Science & Engineering  
Beijing Institute of Technology  
5 Zhongguan South Street, Haidian District, Beijing 100081 (P.R. China)

## Contents

|                                                                    |          |
|--------------------------------------------------------------------|----------|
| Supporting information                                             |          |
| 1. The Optimized cartesian coordinates for the designed compounds. | page S2  |
| 2. The HOMO and LUMO of the designed compounds.                    | page S11 |
| 3. Isodesmic reactions for the designed compounds.                 | page S12 |
| 4. ESP analysis details.                                           | page S13 |
| 5. Density calculation comparison                                  | page S14 |
| References                                                         | page S15 |

### 1. The Optimized Cartesian coordinates for the designed compounds.

We conducted geometry optimization and frequency analysis for RDX,  $\beta$ -HMX,  $\epsilon$ -HNIW, ONC, and the designed molecules at the  $\omega$ B97XD/def2-TZVP level<sup>1,2</sup> in the gas phase using the Gaussian 16 (A.03) program.<sup>3</sup> The optimized structures of all compounds demonstrate true local energy minima on the potential energy surface and do not exhibit any imaginary frequencies.

**Table S1.** Optimized Cartesian coordinates for CEM-1 at the  $\omega$ B97XD/def2-TZVP level of theory

| <b>CEM-1</b> (charge=0, multiplicity=1) |          |          |          |
|-----------------------------------------|----------|----------|----------|
| atom                                    | x        | y        | z        |
| C                                       | -0.63754 | 0.40423  | 1.40602  |
| C                                       | -0.4119  | -1.14695 | 1.24408  |
| C                                       | -0.56566 | -0.17432 | -0.80948 |
| C                                       | 0.91116  | 0.62139  | 1.42203  |
| C                                       | 1.13001  | -0.91756 | 1.24483  |
| C                                       | 1.01073  | 0.05179  | -0.80894 |
| H                                       | 1.41347  | 0.21714  | -1.798   |
| H                                       | -1.00743 | -0.13298 | -1.79602 |
| N                                       | 1.59812  | -1.0845  | -0.12429 |
| N                                       | 1.36417  | 1.11519  | 0.13705  |
| N                                       | -1.09826 | 0.83637  | 0.10267  |
| N                                       | -0.80296 | -1.43656 | -0.11721 |
| H                                       | 1.7286   | -1.46515 | 1.95999  |
| H                                       | 1.35022  | 1.14292  | 2.26295  |
| H                                       | -0.82694 | -1.84063 | 1.96275  |
| H                                       | -1.23294 | 0.79674  | 2.21904  |
| N                                       | -2.02822 | -2.08324 | -0.34371 |
| O                                       | -2.48832 | -1.97122 | -1.44999 |
| O                                       | -2.46236 | -2.7441  | 0.56642  |
| N                                       | -2.44925 | 1.2101   | -0.05451 |
| O                                       | -2.86559 | 1.21103  | -1.18188 |
| O                                       | -3.02741 | 1.55371  | 0.94383  |
| N                                       | 1.08117  | 2.43193  | -0.20594 |
| O                                       | 0.97027  | 3.20745  | 0.71062  |
| O                                       | 1.03482  | 2.67686  | -1.38668 |
| N                                       | 2.98732  | -1.24546 | -0.30717 |
| O                                       | 3.42485  | -0.91419 | -1.37761 |
| O                                       | 3.58742  | -1.76406 | 0.59901  |

**Table S2.** Optimized Cartesian coordinates for CEM-2 at the  $\omega$ B97XD/def2-TZVP level of theory

| <b>CEM-2 (charge=0, multiplicity=1)</b> |          |          |          |
|-----------------------------------------|----------|----------|----------|
| atom                                    | x        | y        | z        |
| C                                       | 1.11471  | -0.07086 | -1.05406 |
| C                                       | 0.07096  | -1.16486 | -0.63651 |
| C                                       | 0.54818  | 0.18786  | 1.13313  |
| C                                       | -0.05569 | 0.85791  | -1.50715 |
| C                                       | -1.09298 | -0.23003 | -1.07505 |
| C                                       | -0.64699 | 1.14949  | 0.69504  |
| H                                       | -0.9916  | 1.78737  | 1.49645  |
| H                                       | 0.83206  | 0.30321  | 2.16968  |
| N                                       | -1.67864 | 0.27962  | 0.15915  |
| N                                       | -0.28961 | 1.8885   | -0.51901 |
| N                                       | 1.62714  | 0.43974  | 0.20224  |
| N                                       | 0.22707  | -1.21128 | 0.78667  |
| H                                       | -1.8186  | -0.6118  | -1.77949 |
| H                                       | -0.04608 | 1.22055  | -2.52659 |
| H                                       | 1.88888  | -0.32546 | -1.76678 |
| N                                       | -0.79195 | -1.83862 | 1.52726  |
| O                                       | -0.89153 | -1.49178 | 2.67394  |
| O                                       | -1.41218 | -2.69147 | 0.94962  |
| N                                       | 2.91357  | -0.02523 | 0.60832  |
| O                                       | 3.1241   | -0.01247 | 1.78875  |
| O                                       | 3.66866  | -0.31316 | -0.27818 |
| N                                       | 0.63767  | 2.92478  | -0.41499 |
| O                                       | 1.23896  | 3.19996  | -1.42194 |
| O                                       | 0.69892  | 3.47496  | 0.65582  |
| N                                       | -2.9739  | 0.85672  | 0.0568   |
| O                                       | -3.2563  | 1.66135  | 0.90166  |
| O                                       | -3.67142 | 0.43348  | -0.82383 |
| N                                       | 0.23725  | -2.47368 | -1.34058 |
| O                                       | -0.35646 | -2.57709 | -2.38854 |
| O                                       | 1.0005   | -3.26311 | -0.85565 |

**Table S3.** Optimized Cartesian coordinates for CEM-3 at the  $\omega$ B97XD/def2-TZVP level of theory

| <b>CEM-3 (charge=0, multiplicity=1)</b> |          |          |          |
|-----------------------------------------|----------|----------|----------|
| atom                                    | x        | y        | z        |
| C                                       | -1.01236 | -0.64394 | -1.23172 |
| C                                       | -0.9894  | 0.68095  | -0.38715 |
| C                                       | -0.90897 | -1.14801 | 0.96677  |
| C                                       | 0.54125  | -0.62542 | -1.34308 |
| C                                       | 0.58822  | 0.69816  | -0.50492 |
| C                                       | 0.6749   | -1.11983 | 0.86943  |
| H                                       | 1.15968  | -1.63688 | 1.68768  |
| H                                       | -1.27277 | -1.6805  | 1.83431  |
| N                                       | 1.05764  | 0.30631  | 0.82039  |
| N                                       | 1.0334   | -1.63775 | -0.4433  |
| N                                       | -1.39711 | -1.67092 | -0.28998 |
| N                                       | -1.42214 | 0.23069  | 0.89579  |
| H                                       | 0.98675  | -0.63837 | -2.32912 |
| H                                       | -1.58364 | -0.65047 | -2.15148 |
| N                                       | -1.20617 | 1.06306  | 2.0203   |
| O                                       | -1.16335 | 0.49005  | 3.07631  |
| O                                       | -1.14587 | 2.23804  | 1.80065  |
| N                                       | -2.76419 | -2.06468 | -0.2972  |
| O                                       | -3.18101 | -2.52117 | 0.73087  |
| O                                       | -3.33319 | -1.96396 | -1.34967 |
| N                                       | 2.34652  | -2.12377 | -0.63294 |
| O                                       | 2.75261  | -2.11483 | -1.76181 |
| O                                       | 2.89025  | -2.55898 | 0.34868  |
| N                                       | 2.45745  | 0.48016  | 1.14924  |
| O                                       | 2.7464   | 0.09141  | 2.24051  |
| O                                       | 3.15672  | 1.00345  | 0.32817  |
| N                                       | -1.81018 | 1.77797  | -0.99507 |
| O                                       | -1.31704 | 2.28583  | -1.97509 |
| O                                       | -2.89613 | 1.98161  | -0.53412 |
| N                                       | 1.21526  | 1.93723  | -1.07934 |
| O                                       | 1.13899  | 2.91982  | -0.39224 |
| O                                       | 1.69847  | 1.83208  | -2.17385 |

**Table S4.** Optimized Cartesian coordinates for CEM-4 at the  $\omega$ B97XD/def2-TZVP level of theory

| <b>CEM-4</b> (charge=0, multiplicity=1) |          |          |          |
|-----------------------------------------|----------|----------|----------|
| atom                                    | x        | y        | z        |
| C                                       | 0.99085  | 0.18428  | -0.9979  |
| C                                       | 0.18131  | -1.10129 | -0.60596 |
| C                                       | 1.35708  | -0.34009 | 1.18066  |
| C                                       | -0.21647 | 1.08655  | -0.62072 |
| C                                       | -1.05427 | -0.19241 | -0.22449 |
| C                                       | 0.11547  | 0.56356  | 1.57661  |
| H                                       | 0.12959  | 0.86498  | 2.6149   |
| H                                       | 2.03187  | -0.52661 | 2.00441  |
| N                                       | -1.09662 | -0.17367 | 1.23531  |
| N                                       | -0.01497 | 1.70818  | 0.6596   |
| N                                       | 1.97948  | 0.31723  | 0.05048  |
| N                                       | 0.87862  | -1.57428 | 0.54318  |
| H                                       | 1.37592  | 0.26733  | -2.00743 |
| N                                       | 0.24975  | -2.53391 | 1.3758   |
| O                                       | 0.62565  | -2.53975 | 2.51737  |
| O                                       | -0.53692 | -3.25758 | 0.83863  |
| N                                       | 3.30791  | -0.11713 | -0.26573 |
| O                                       | 3.97642  | -0.44927 | 0.67073  |
| O                                       | 3.61878  | -0.03818 | -1.41932 |
| N                                       | 0.98884  | 2.70338  | 0.75008  |
| O                                       | 1.2475   | 3.28684  | -0.26539 |
| O                                       | 1.4298   | 2.88316  | 1.85246  |
| N                                       | -2.25774 | 0.44989  | 1.87141  |
| O                                       | -2.11314 | 0.65645  | 3.0387   |
| O                                       | -3.2157  | 0.63945  | 1.18718  |
| N                                       | 0.07898  | -2.08763 | -1.73694 |
| O                                       | -0.73827 | -1.81281 | -2.58    |
| O                                       | 0.87519  | -2.98187 | -1.74731 |
| N                                       | -2.36406 | -0.55841 | -0.88702 |
| O                                       | -2.82544 | -1.60128 | -0.51524 |
| O                                       | -2.782   | 0.1916   | -1.72069 |
| N                                       | -0.75877 | 2.01857  | -1.67638 |
| O                                       | -1.52974 | 2.85261  | -1.29774 |
| O                                       | -0.37225 | 1.8113   | -2.79683 |

**Table S5.** Optimized Cartesian coordinates for CEM-5 at the  $\omega$ B97XD/def2-TZVP level of theory

| <b>CEM-5 (charge=0, multiplicity=1)</b> |          |          |          |
|-----------------------------------------|----------|----------|----------|
| atom                                    | x        | y        | z        |
| C                                       | -1.10402 | 0.16627  | 0.4312   |
| C                                       | -0.17053 | -1.10768 | 0.4353   |
| C                                       | -0.63673 | -0.45959 | -1.70157 |
| C                                       | 0.17051  | 1.10768  | 0.43538  |
| C                                       | 1.10399  | -0.16627 | 0.43119  |
| C                                       | 0.63673  | 0.45973  | -1.70153 |
| H                                       | 0.9788   | 0.70864  | -2.69696 |
| H                                       | -0.9788  | -0.70844 | -2.69702 |
| N                                       | 1.6609   | -0.21778 | -0.9162  |
| N                                       | 0.40633  | 1.64495  | -0.86891 |
| N                                       | -1.66093 | 0.21783  | -0.91619 |
| N                                       | -0.40633 | -1.64486 | -0.86903 |
| N                                       | 0.49054  | -2.62483 | -1.37228 |
| O                                       | 0.53271  | -2.70068 | -2.56997 |
| O                                       | 1.05249  | -3.29041 | -0.55292 |
| N                                       | -2.95264 | -0.45093 | -1.13386 |
| O                                       | -3.26222 | -0.51435 | -2.28442 |
| O                                       | -3.54793 | -0.82101 | -0.16986 |
| N                                       | -0.49051 | 2.62498  | -1.37211 |
| O                                       | -1.05246 | 3.29052  | -0.55272 |
| O                                       | -0.53265 | 2.70091  | -2.5698  |
| N                                       | 2.95266  | 0.45087  | -1.1338  |
| O                                       | 3.26206  | 0.51477  | -2.28439 |
| O                                       | 3.54819  | 0.82042  | -0.16973 |
| N                                       | -0.39074 | -2.12864 | 1.54148  |
| O                                       | 0.26773  | -1.98679 | 2.53339  |
| O                                       | -1.23697 | -2.9433  | 1.3168   |
| N                                       | 2.12845  | -0.44435 | 1.51663  |
| O                                       | 2.79257  | -1.42159 | 1.3198   |
| O                                       | 2.15052  | 0.30482  | 2.4489   |
| N                                       | 0.39068  | 2.12854  | 1.54166  |
| O                                       | 1.23711  | 2.94307  | 1.31719  |
| O                                       | -0.26801 | 1.98677  | 2.53342  |
| N                                       | -2.12842 | 0.44432  | 1.51668  |
| O                                       | -2.1503  | -0.30474 | 2.44906  |
| O                                       | -2.79279 | 1.42136  | 1.31973  |

**Table S6.** Optimized Cartesian coordinates for RDX at the  $\omega$ B97XD/def2-TZVP level of theory

| <b>RDX</b> (charge=0, multiplicity=1) |           |           |           |
|---------------------------------------|-----------|-----------|-----------|
| atom                                  | x         | y         | z         |
| C                                     | 0.967103  | -0.986793 | 0.213879  |
| N                                     | 1.378162  | 0.354408  | -0.175428 |
| N                                     | -0.382185 | -1.370734 | -0.175398 |
| H                                     | 1.676792  | -1.711226 | -0.185443 |
| H                                     | 1.018707  | -1.039492 | 1.306107  |
| C                                     | 0.371028  | 1.330882  | 0.213993  |
| C                                     | -1.338188 | -0.344043 | 0.213921  |
| N                                     | -0.995915 | 1.016241  | -0.175552 |
| H                                     | 0.643498  | 2.307824  | -0.185091 |
| H                                     | 0.390764  | 1.401657  | 1.306246  |
| H                                     | -2.320502 | -0.596608 | -0.185151 |
| H                                     | -1.409486 | -0.362262 | 1.306210  |
| H                                     | -0.423910 | -1.520220 | -1.176351 |
| H                                     | -1.104854 | 1.127488  | -1.176371 |
| H                                     | 1.528899  | 0.393152  | -1.176278 |



**Table S7.** Optimized Cartesian coordinates for  $\beta$ -HMX at the  $\omega$ B97XD/def2-TZVP level of theory

| <b><math>\beta</math>-HMX</b> (charge=0, multiplicity=1) |           |           |           |
|----------------------------------------------------------|-----------|-----------|-----------|
| atom                                                     | x         | y         | z         |
| O                                                        | 1.942030  | -2.343179 | -0.339851 |
| N                                                        | 0.743228  | -2.290774 | -0.191089 |
| O                                                        | -0.082640 | -3.033562 | -0.667948 |
| N                                                        | 0.271889  | -1.251122 | 0.584561  |
| C                                                        | 1.235726  | -0.339050 | 1.169419  |
| C                                                        | -1.131551 | -1.194920 | 0.867705  |
| N                                                        | 1.865851  | 0.537314  | 0.215330  |
| H                                                        | 0.684672  | 0.246352  | 1.904117  |
| H                                                        | 2.035252  | -0.876346 | 1.672380  |
| N                                                        | -1.865853 | -0.537288 | -0.215338 |
| H                                                        | -1.527061 | -2.197774 | 0.998447  |
| H                                                        | -1.263081 | -0.646492 | 1.801035  |
| N                                                        | 3.223186  | 0.429587  | 0.016687  |
| C                                                        | 1.131550  | 1.194937  | -0.867719 |
| N                                                        | -3.223187 | -0.429564 | -0.016694 |
| C                                                        | -1.235729 | 0.339072  | -1.169431 |
| O                                                        | 3.877692  | -0.124974 | 0.865461  |
| O                                                        | 3.643797  | 0.950484  | -0.995005 |
| N                                                        | -0.271889 | 1.251145  | -0.584578 |
| H                                                        | 1.527063  | 2.197788  | -0.998471 |
| H                                                        | 1.263079  | 0.646500  | -1.801044 |
| O                                                        | -3.877701 | 0.124953  | -0.865490 |
| O                                                        | -3.643803 | -0.950514 | 0.994969  |
| H                                                        | -0.684677 | -0.246332 | -1.904128 |
| H                                                        | -2.035256 | 0.876368  | -1.672390 |
| N                                                        | -0.743226 | 2.290800  | 0.191069  |
| O                                                        | -1.942019 | 2.343141  | 0.339923  |
| O                                                        | 0.082651  | 3.033525  | 0.668011  |

**Table S8.** Optimized Cartesian coordinates for HNIW at the  $\omega$ B97XD/def2-TZVP level of theory

| HNIW (charge=0, multiplicity=1) |           |           |           |
|---------------------------------|-----------|-----------|-----------|
| atom                            | x         | y         | z         |
| C                               | 0.000100  | 1.450883  | 0.483513  |
| H                               | 0.000295  | 2.491959  | 0.781746  |
| N                               | -1.144837 | 1.126174  | -0.352671 |
| C                               | 0.000138  | 0.490111  | 1.750081  |
| N                               | 1.144756  | 1.126064  | -0.352850 |
| N                               | -1.794618 | 2.204801  | -1.006864 |
| C                               | -0.790051 | -0.038126 | -1.158746 |
| N                               | -1.077418 | -0.473626 | 1.724600  |
| H                               | 0.000227  | 1.066887  | 2.666920  |
| N                               | 1.077617  | -0.473673 | 1.724426  |
| C                               | 0.790060  | -0.038165 | -1.158857 |
| N                               | 1.795682  | 2.204232  | -1.006225 |
| O                               | -2.375796 | 1.932335  | -2.022816 |
| O                               | -1.742217 | 3.265545  | -0.447939 |
| H                               | -1.210164 | 0.050123  | -2.154689 |
| N                               | -1.245877 | -1.252772 | -0.555178 |
| C                               | -0.788706 | -1.542819 | 0.772135  |
| N                               | -2.372777 | -0.039694 | 1.915985  |
| N                               | 2.373014  | -0.040024 | 1.915855  |
| C                               | 0.788768  | -1.542855 | 0.772064  |
| N                               | 1.245962  | -1.252783 | -0.555212 |
| H                               | 1.210076  | 0.050045  | -2.154859 |
| O                               | 2.377247  | 1.931562  | -2.021918 |
| O                               | 1.743246  | 3.265043  | -0.447405 |
| N                               | -2.299014 | -1.980734 | -1.121804 |
| H                               | -1.210958 | -2.488097 | 1.092083  |
| O                               | -3.241920 | -0.808148 | 1.589377  |
| O                               | -2.497650 | 1.050259  | 2.418994  |
| O                               | 3.242018  | -0.808813 | 1.589639  |
| O                               | 2.498100  | 1.049894  | 2.418920  |
| H                               | 1.211070  | -2.488155 | 1.091900  |
| N                               | 2.297831  | -1.981807 | -1.122611 |
| O                               | -2.613802 | -2.989623 | -0.550204 |
| O                               | -2.753057 | -1.542613 | -2.145508 |
| O                               | 2.751013  | -1.544570 | -2.147086 |
| O                               | 2.612237  | -2.990875 | -0.551103 |

**Table S9.** Optimized Cartesian coordinates for ONC at the  $\omega$ B97XD/def2-TZVP level of theory

| <b>ONC (charge=0, multiplicity=1)</b> |           |           |           |
|---------------------------------------|-----------|-----------|-----------|
| atom                                  | x         | y         | z         |
| C                                     | 0.768688  | 0.696398  | 0.858238  |
| C                                     | -0.768261 | -0.683857 | -0.868167 |
| N                                     | 1.609800  | 1.413401  | 1.838595  |
| N                                     | -1.609835 | -1.481770 | -1.783445 |
| O                                     | 1.248050  | 1.304802  | 2.980584  |
| O                                     | -1.248800 | -2.619839 | -1.929229 |
| O                                     | 2.568892  | 1.992341  | 1.404267  |
| O                                     | -2.568654 | -0.929934 | -2.252268 |
| C                                     | 0.777013  | 0.856414  | -0.689324 |
| C                                     | -0.774523 | 0.861060  | -0.685679 |
| N                                     | 1.626937  | 1.834789  | -1.398725 |
| N                                     | -1.622574 | 1.768778  | -1.485488 |
| O                                     | 2.590798  | 1.398269  | -1.968014 |
| O                                     | -2.586229 | 2.229695  | -0.935414 |
| C                                     | -0.782722 | 0.678595  | 0.859271  |
| C                                     | 0.783158  | -0.691147 | -0.849337 |
| N                                     | -1.640372 | 1.470568  | 1.764736  |
| N                                     | 1.640338  | -1.402436 | -1.819928 |
| O                                     | -1.289228 | 2.611196  | 1.914621  |
| O                                     | 1.290382  | -1.297211 | -2.965902 |
| O                                     | -2.600618 | 0.911909  | 2.222405  |
| O                                     | 2.598902  | -1.973924 | -1.374738 |
| C                                     | 0.774821  | -0.851155 | 0.698239  |
| C                                     | -0.776475 | -0.866356 | 0.676774  |
| N                                     | 1.623255  | -1.823835 | 1.417231  |
| N                                     | -1.627596 | -1.779547 | 1.467026  |
| O                                     | 1.271803  | -2.969012 | 1.308357  |
| O                                     | -1.277925 | -1.925353 | 2.608638  |
| O                                     | 2.577502  | -1.380946 | 1.997649  |
| O                                     | -2.581847 | -2.246946 | 0.906161  |
| O                                     | 1.266426  | 2.977540  | -1.294239 |
| O                                     | -1.260687 | 1.917495  | -2.622891 |

2. The HOMO and LUMO of the designed compounds.

(a) HOMO

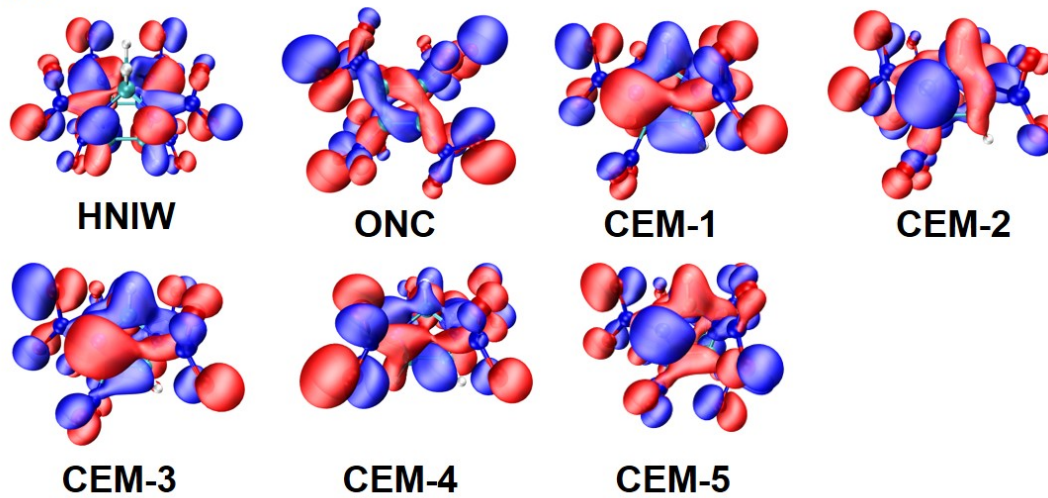

(b) LUMO

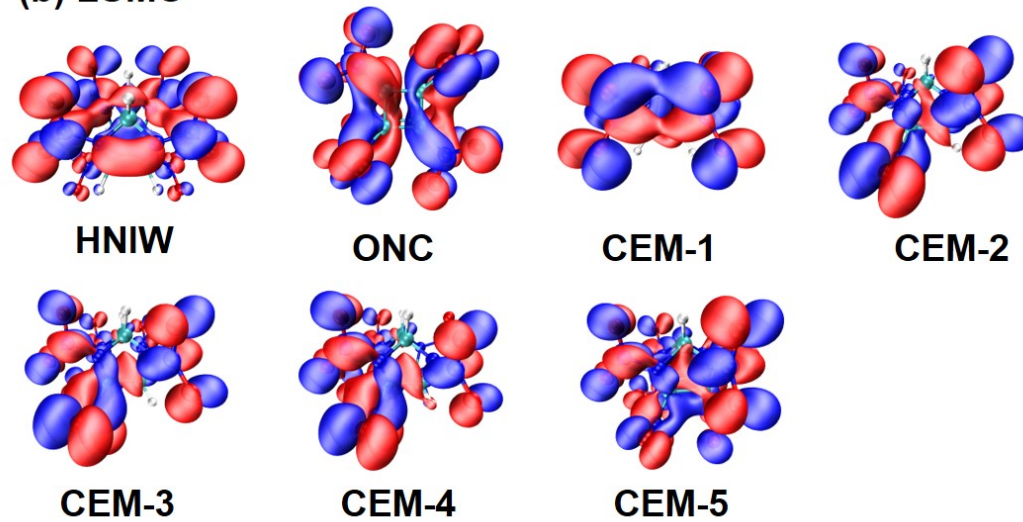

Figure S1. The HOMO (a) and LUMO (b) of HNIW, ONC, and the designed compounds.

### 3. Isodesmic reactions for the designed compounds.

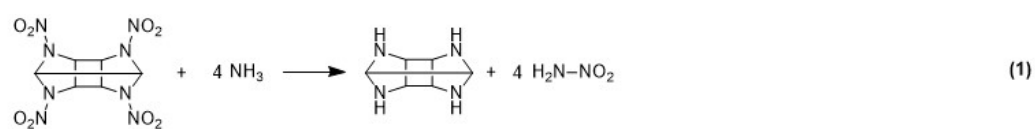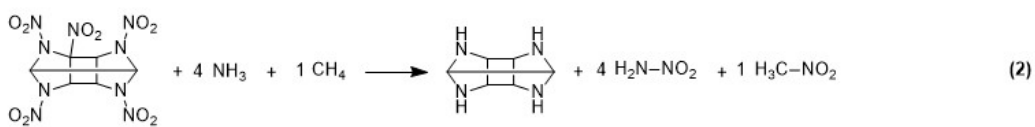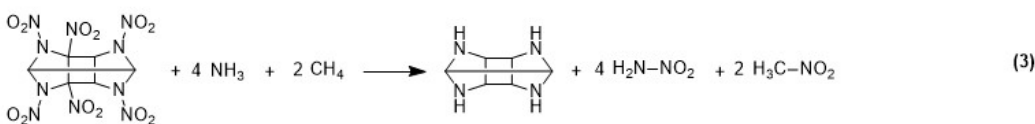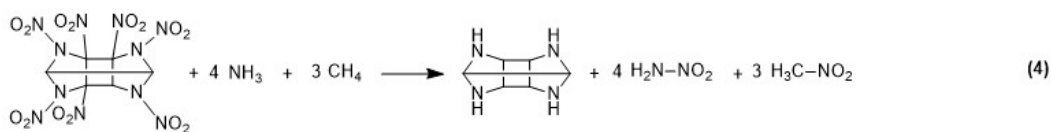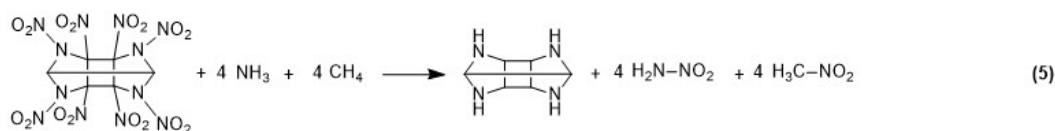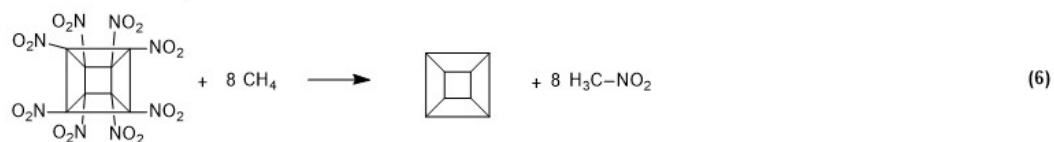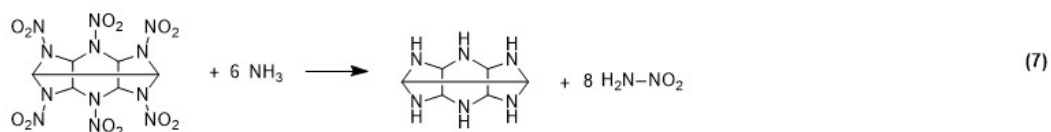

**Scheme S1.** The isodesmic reactions for HNIW, ONC, and the designed compounds.

#### 4. ESP analysis supplementary details.

**Table S10.** ESP analysis supplementary details.

| Compd.       | $\sigma_{\text{tot}}^2$ <sup>[a]</sup> | $\sigma^{+2}$ <sup>[b]</sup> | $\nu$ <sup>[c]</sup> | $u\sigma_{\text{tot}}^2$ |
|--------------|----------------------------------------|------------------------------|----------------------|--------------------------|
|              | (kcal/mol) <sup>2</sup>                | (kcal/mol) <sup>2</sup>      |                      | (kcal/mol) <sup>2</sup>  |
| <b>CEM-1</b> | 219.09                                 | 189.68                       | 0.12                 | 25.46                    |
| <b>CEM-2</b> | 200.91                                 | 183.69                       | 0.08                 | 15.75                    |
| <b>CEM-3</b> | 239.57                                 | 222.61                       | 0.07                 | 15.76                    |
| <b>CEM-4</b> | 201.14                                 | 187.50                       | 0.06                 | 12.71                    |
| <b>CEM-5</b> | 211.49                                 | 199.14                       | 0.05                 | 11.62                    |
| HNIW         | 255.06                                 | 239.03                       | 0.06                 | 15.02                    |
| ONC          | 136.24                                 | 131.53                       | 0.03                 | 4.55                     |

[a] Overall variance, [b] Positive variance, [c] Balance of charges.

## 5. Density calculation comparison.

**Table S11.** Density calculation comparison. Optimized Cartesian coordinates for those compounds at the  $\omega$ B97XD/def2-TZVP level of theory in our calculation.

|    | Compound Name                                                                                            | Density Exp <sup>4</sup> | Politer's results <sup>4</sup> | Our results |
|----|----------------------------------------------------------------------------------------------------------|--------------------------|--------------------------------|-------------|
| 1  | 3,5-Diamino-2,4,6-trinitrophenol                                                                         | 1.89                     | 1.853                          | 1.849       |
| 2  | 3,5-Diamino-2,4,6-trinitrobenzoic acid                                                                   | 1.863                    | 1.912                          | 1.846       |
| 3  | 1,1,3,3-Tetranitrocyclobutane                                                                            | 1.831                    | 0.805                          | 1.83        |
| 4  | 1,3,5,7-Tetranitrocubane                                                                                 | 1.814                    | 1.809                          | 1.838       |
| 5  | 1,3,5-Trinitro-1,3,5-triazacyclohexane                                                                   | 1.806                    | 1.796                          | 1.796       |
| 6  | 1,4-Dinitroimidazole                                                                                     | 1.8                      | 1.818                          | 1.768       |
| 7  | 1,2,4-Trinitrobenzene                                                                                    | 1.794                    | 1.74                           | 1.735       |
| 8  | 2,4,6-Trinitroaniline                                                                                    | 1.773                    | 1.768                          | 1.779       |
| 9  | 4-Nitro-1H-1,2,3-triazole                                                                                | 1.689                    | 1.773                          | 1.673       |
| 10 | 2,4-Dinitrophenol                                                                                        | 1.668                    | 1.69                           | 1.696       |
| 11 | N-Nitropyrazole                                                                                          | 1.585                    | 1.596                          | 1.576       |
| 12 | 1,3-Dinitro-1,3-diazacyclohexane                                                                         | 1.572                    | 1.615                          | 1.599       |
| 13 | NC-N(NO <sub>2</sub> )-(CH <sub>2</sub> ) <sub>4</sub> -N(NO <sub>2</sub> )-CN                           | 1.527                    | 1.557                          | 1.524       |
| 14 | H <sub>3</sub> C-N(NO <sub>2</sub> )-CH(OCH <sub>3</sub> )-N(NO <sub>2</sub> )-CH <sub>3</sub>           | 1.518                    | 1.561                          | 1.546       |
| 15 | 6-Methyl-2-nitrobenzotrile                                                                               | 1.441                    | 1.456                          | 1.413       |
| 16 | H <sub>3</sub> C-C(CH <sub>3</sub> )NO <sub>2</sub> -C(CH <sub>3</sub> )NO <sub>2</sub> -CH <sub>3</sub> | 1.43                     | 1.392                          | 1.414       |
| 17 | Nitromethane                                                                                             | 1.422                    | 1.438                          | 1.418       |
| 18 | Dimethylnitramine                                                                                        | 1.363                    | 1.385                          | 1.364       |
| 19 | Octanitrocubane                                                                                          | 1.978                    | 1.982                          | 2.06        |
| 20 | [(O <sub>2</sub> N) <sub>3</sub> C-CH <sub>2</sub> ] <sub>2</sub> N-NO <sub>2</sub>                      | 1.953                    | 1.932                          | 1.797       |
| 21 | 5-Nitro-2,4-dihydro-3H-1,2,4-triazole-3-one                                                              | 1.927                    | 1.81                           | 1.762       |
| 22 | Benzotrifuroxan                                                                                          | 1.901                    | 1.894                          | 1.966       |
| 23 | 1,3,5,7-Tetranitro-1,3,5,7-tetraazacyclooctane                                                           | 1.894                    | 1.821                          | 1.9         |
| 24 | 1,3,5-Trinitro-2,4,6-trihydroxybenzene                                                                   | 1.887                    | 1.922                          | 1.954       |
| 25 | 1,1-Diamino-2,2-dinitroethene                                                                            | 1.883                    | 1.868                          | 1.734       |
| 26 | 1,3,3-Trinitroazetidene                                                                                  | 1.961                    | 1.772                          | 1.787       |
| 27 | 2,4,6-Trinitrobenzoic acid                                                                               | 1.786                    | 1.862                          | 1.82        |
| 28 | Nitromalonamide                                                                                          | 1.78                     | 1.775                          | 1.676       |
| 29 | 2,4,6-Trinitro-N-methyl-N-nitroaniline                                                                   | 1.731                    | 1.775                          | 1.784       |
| 30 | 2,2,3,3-Tetranitrobutane                                                                                 | 1.716                    | 1.752                          | 1.796       |
| 31 | 3-Methoxy-2,4,6-trinitroaniline                                                                          | 1.71                     | 1.737                          | 1.74        |
| 32 | O <sub>2</sub> N-NH-(CH <sub>2</sub> ) <sub>2</sub> -NH-NO <sub>2</sub>                                  | 1.709                    | 1.653                          | 1.598       |
| 33 | HO-CH <sub>2</sub> -C(NO <sub>2</sub> ) <sub>2</sub> -CH <sub>2</sub> -OH                                | 1.652                    | 1.697                          | 1.678       |
| 34 | 3,4-Diaminofurazan                                                                                       | 1.609                    | 1.594                          | 1.495       |
| 35 | Trans-1,2-dinitrocyclopropane                                                                            | 1.603                    | 1.631                          | 1.633       |
| 36 | H <sub>2</sub> N-(CH <sub>2</sub> ) <sub>2</sub> -NH-NO <sub>2</sub>                                     | 1.563                    | 1.478                          | 1.371       |





## Reference

- 1 J. D. Chai and M. Head-Gordon, *Phys. Chem. Chem. Phys.*, 2008, **10**, 6615-6620.
- 2 F. Weigend and R. Ahlrichs, *Phys. Chem. Chem. Phys.*, 2005, **7**, 3297-3305.
- 3 M.J. Frisch, G.W. Trucks, H.B. Schlegel, G.E. Scuseria, M.A. Robb, J.R. Cheeseman, G. Scalmani, V. Barone, G.A. Petersson, H. Nakatsuji, X. Li, M. Caricato, A.V. Marenich, J. Bloino, B.G. Janesko, R. Gomperts, B. Mennucci, H.P. Hratchian, J.V. Ortiz, A.F. Izmaylov, J.L. Sonnenberg, D. Williams-Young, F. Ding, F. Lipparini, F. Egidi, J. Goings, B. Peng, A. Petrone, T. Henderson, D. Ranasinghe, V.G. Zakrzewski, J. Gao, N. Rega, G. Zheng, W. Liang, M. Hada, M. Ehara, K. Toyota, R. Fukuda, J. Hasegawa, M. Ishida, T. Nakajima, Y. Honda, O. Kitao, H. Nakai, T. Vreven, K. Throssell, J.A. Montgomery, Jr., J.E. Peralta, F. Ogliaro, M.J. Bearpark, J.J. Heyd, E.N. Brothers, K.N. Kudin, V.N. Staroverov, T.A. Keith, R. Kobayashi, J. Normand, K. Raghavachari, A.P. Rendell, J.C. Burant, S.S. Iyengar, J. Tomasi, M. Cossi, J.M. Millam, M. Klene, C. Adamo, R. Cammi, J.W. Ochterski, R.L. Martin, K. Morokuma, O. Farkas, J.B. Foresman and D. J. Fox, Gaussian 16, revision A. 03; Gaussian, Inc.: Wallingford, CT, 2016.
- 4 P. Politzer, J. Martinez, J. S. Murray, M. C. Concha and A. Toro-Labbé, *Mol Phys*, 2009, **107**, 2095-2101.
